# Supplementary material for: MeDEStrand: an improved method to infer genome-wide absolute methylation levels from DNA enrichment data
Source: Springer Nature journal article supplement (doi:10.1186/s12859-018-2574-7), 2018-12-01

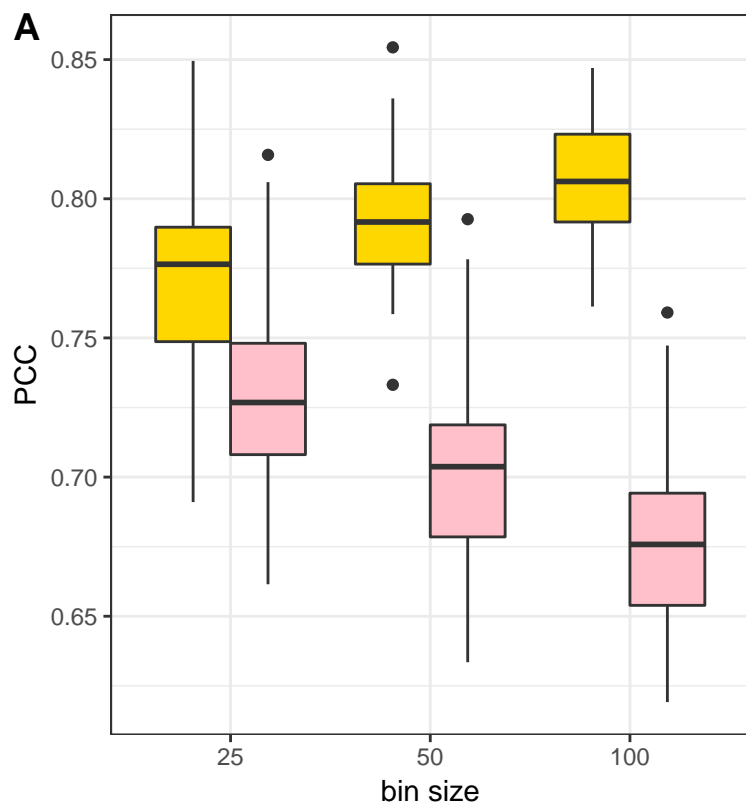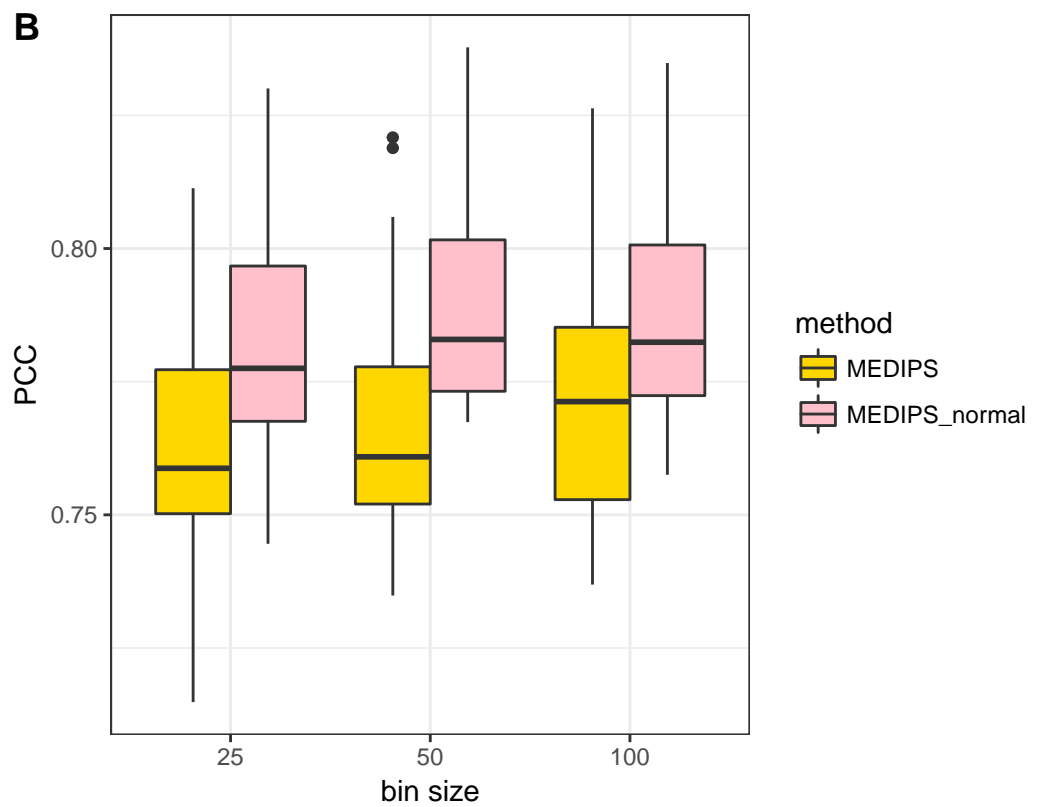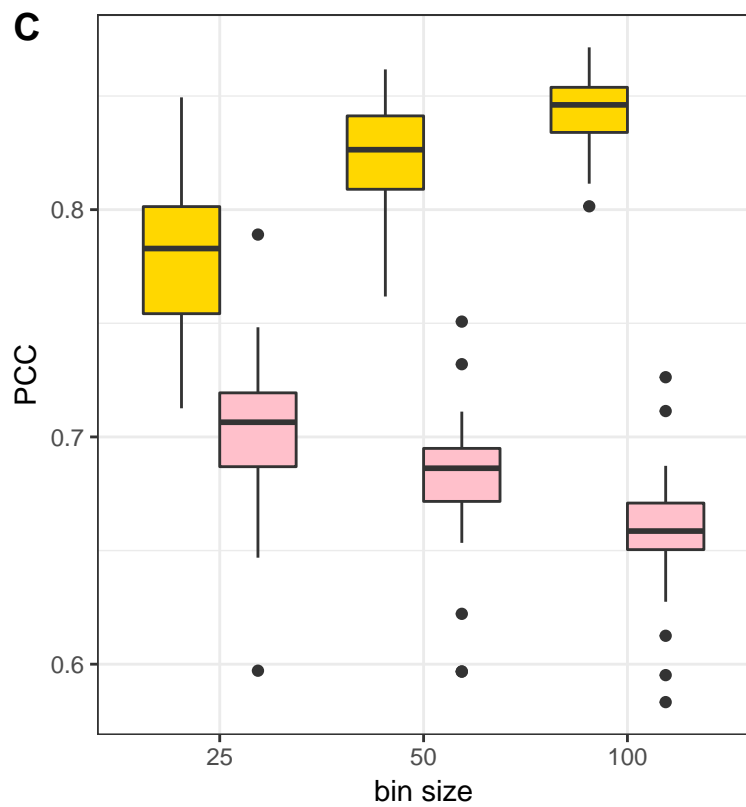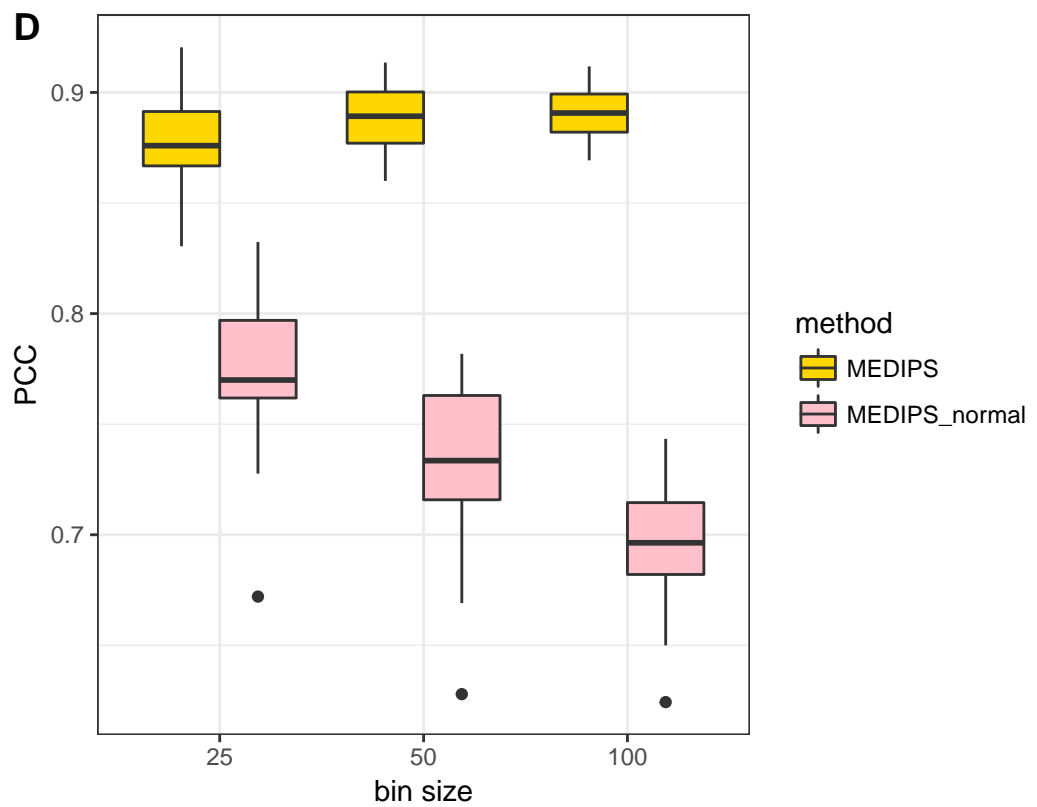

Supplement: 12859_2018_2574_MOESM5_ESM.pdf [file 12859_2018_2574_MOESM5_ESM.pdf]
